# Supplementary material for: Microhomology Directs Diverse DNA Break Repair Pathways and Chromosomal Translocations
Source: PubMed Central journal article supplement (PMC3493447; doi:10.1371/journal.pgen.1003026), 2012-11-08

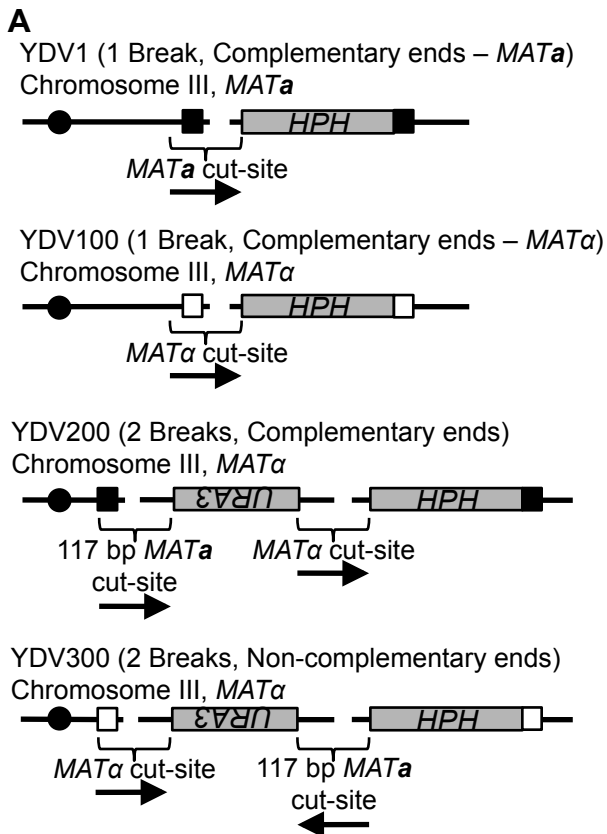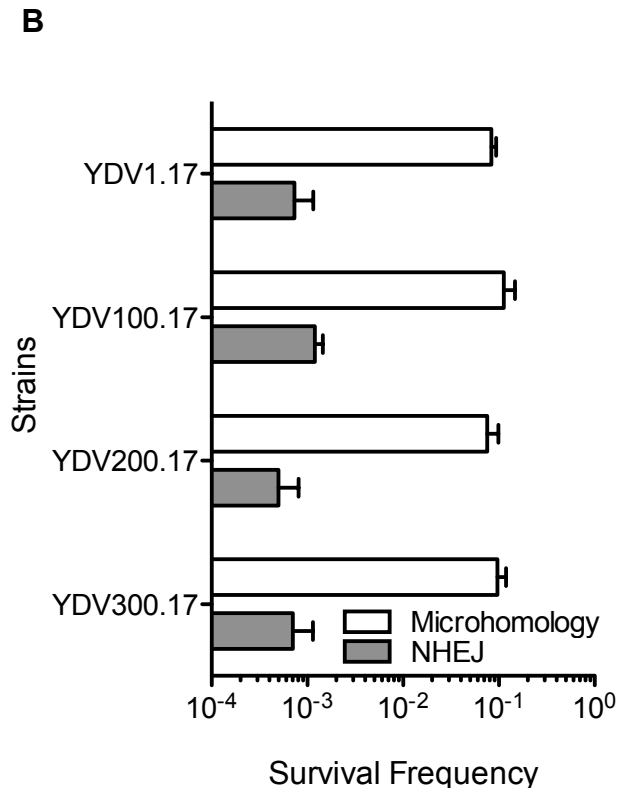

Supplement: pgen.1003026.s001.pdf [file pgen.1003026.s001.pdf]
