# Supplementary material for: Microhomology Directs Diverse DNA Break Repair Pathways and Chromosomal Translocations
Source: PubMed Central journal article supplement (PMC3493447; doi:10.1371/journal.pgen.1003026), 2012-11-08
Supplement: pgen.1003026.s002.pdf [file pgen.1003026.s002.pdf]

**A**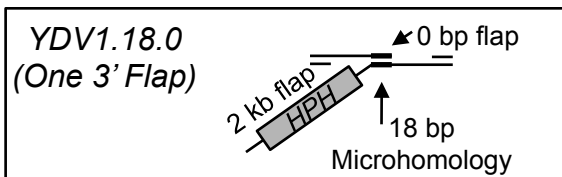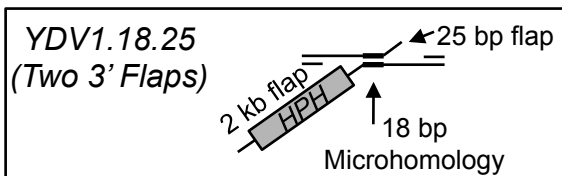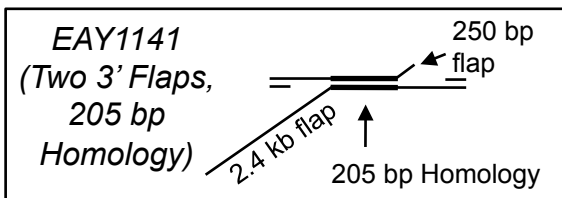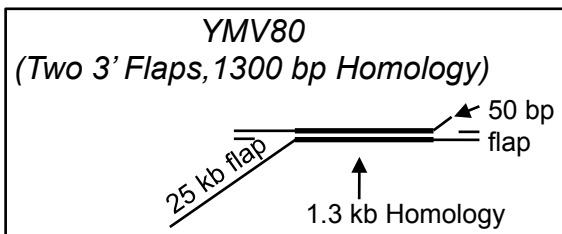**B**

| Strain                  | Hyg <sup>S</sup> Surv. | Std. Dev. | Fold-Change | P-Value       |
|-------------------------|------------------------|-----------|-------------|---------------|
| YDV1.18.0               | 0.089                  | 0.0073    | 1.00        | --            |
| YDV1.18.0 <i>pol32Δ</i> | 0.011                  | 0.0026    | <b>0.12</b> | <b>0.0026</b> |

|                          |        |         |             |                |
|--------------------------|--------|---------|-------------|----------------|
| YDV1.18.25               | 0.033  | 0.0155  | 1.00        | --             |
| YDV1.18.25 <i>pol32Δ</i> | 0.0010 | 0.00020 | <b>0.03</b> | <b>0.00020</b> |

| Strain                | Hyg <sup>S</sup> Surv. | Std. Dev. | Fold-Change | P-Value      |
|-----------------------|------------------------|-----------|-------------|--------------|
| EAY1141               | 0.97                   | 0.172     | 1.00        | --           |
| EAY1141 <i>pol32Δ</i> | 0.62                   | 0.048     | <b>0.64</b> | <b>0.071</b> |

|                     |      |       |             |              |
|---------------------|------|-------|-------------|--------------|
| YMV80               | 0.75 | 0.044 | 1.00        | --           |
| YMV80 <i>pol32Δ</i> | 0.79 | 0.021 | <b>1.05</b> | <b>0.394</b> |
